# Supplementary material
Source: PubMed Central journal article supplement (PMC2810640)
Supplement: NIHMS165331-supplement-01.pdf [file NIHMS165331-supplement-01.pdf]

## Supplementary Table

The expression of Nox family members in cancer cells.

| Gene | Src-3T3 | SCC61 | C8161.9 | RPMI-7951 | Bt549 |
|------|---------|-------|---------|-----------|-------|
| Nox1 | +       | +/-   | -       | -         | -     |
| Nox2 | -       | +/-   | -       | +/-       | +/-   |
| Nox3 | +/-     | -     | -       | -         | -     |
| Nox4 | +       | +     | +       | +         | +     |

The expression of Nox 1-4 was determined by RT-PCR using primer pairs as described in reference 33.

## **Legends to Supplementary Figures**

### ***Supplementary Figure 1. Characterization of DPI-treated Src-3T3 cells.***

Src-3T3 cells were treated with DMSO or 20 $\mu$ M DPI as indicated, then stained for Tks5 (Panel A), cortactin (panel B) or MT1-MMP (panel C). In each case, the phalloidin stain is in red, and the antibody stain in green.

### ***Supplementary Figure 2. Knockdown of p22 in Src-3T3 cells.***

*Panel A.* RT-PCR analysis of p22 and actin levels for the experiment shown in Figure 3A and B.

*Panel B.* Representative pictures of the effect of scrambled (scr) and two siRNAs specific for p22 (RNAi#2 and RNAi#3) on invadopodia formation, as judged by phalloidin staining of the F-actin.

*Panel C.* qPCR analysis of p22 levels (normalized to cyclophilin levels) following transfection of pooled or individual p22 siRNAs, as shown in panel B.

*Panel D.* Quantitation of percentage of cells containing rosettes for the transfected cells in panel B.

### ***Supplementary Figure 3. Knockdown of Nox4 in Src-3T3 cells.***

*Panel A.* RT-PCR analysis of Nox4 and actin levels for the experiment shown in Figure 3D.

*Panel B.* RT-PCR analysis of Nox4 and actin levels following transfection of scrambled or Nox4#1 siRNA.

*Panel C.* Representative pictures (top) and quantitation (bottom) of rosette formation of the transfected cells analyzed for mRNA levels in panel B.

### ***Supplementary Figure 4. Knockdown of Nox components in human cancer cells.***

*Panel A.* RT-PCR analysis of p22 and actin levels for the experiment shown in Figure 5A (invadopodia assay).

*Panel B.* RT-PCR analysis of p22 and actin levels for the experiment shown in Figure 5A (gelatin assay).

*Panel C.* RT-PCR analysis of p22 and actin levels following transfection of SCC61 cells scrambled, p22 pooled, siRNA#1 and siRNA#2.

*Panel D.* Representative images of SCC61 cells transfected with scrambled, siRNA#1 and siRNA#2, as analyzed in panel C.

*Panel E.* qPCR analysis of p22 mRNA levels, normalized to cyclophilin levels, for the experiment shown in Figure 6B.

*Panel F.* Representative images of C8161.9 cells transfected with scrambled and p22<sup>phox</sup> siRNA pool, stained with phalloidin.

*Panel G.* RT-PCR analysis of p22 and actin mRNA levels, for the experiment shown in panel F.

*Panel H.* RT-PCR analysis of p22 and actin mRNA levels, for the experiment shown in Figure 5B.

*Panel I.* RT-PCR analysis of Nox4 and actin levels, corresponding to the experiment shown in Figure 5C.

***Supplementary Figure 5. Knockdown of Tks5 and ROS production.***

Tks5 levels were determined by immunoblotting for the experiments shown in Figure 6A (Panel A), 6B (Panel B) and 6C (Panel C). B16-F10 melanoma cells from the experiment shown in Figure 6D were probed by immunoblot for Tks5 and p22<sup>phox</sup> levels (Panel D, left) and Nox4 and actin mRNA levels by RT-PCR (Panel D, right).

***Supplementary Figure 6. Relative phosphotyrosine levels of the Src substrates shown in Figure 8A.***

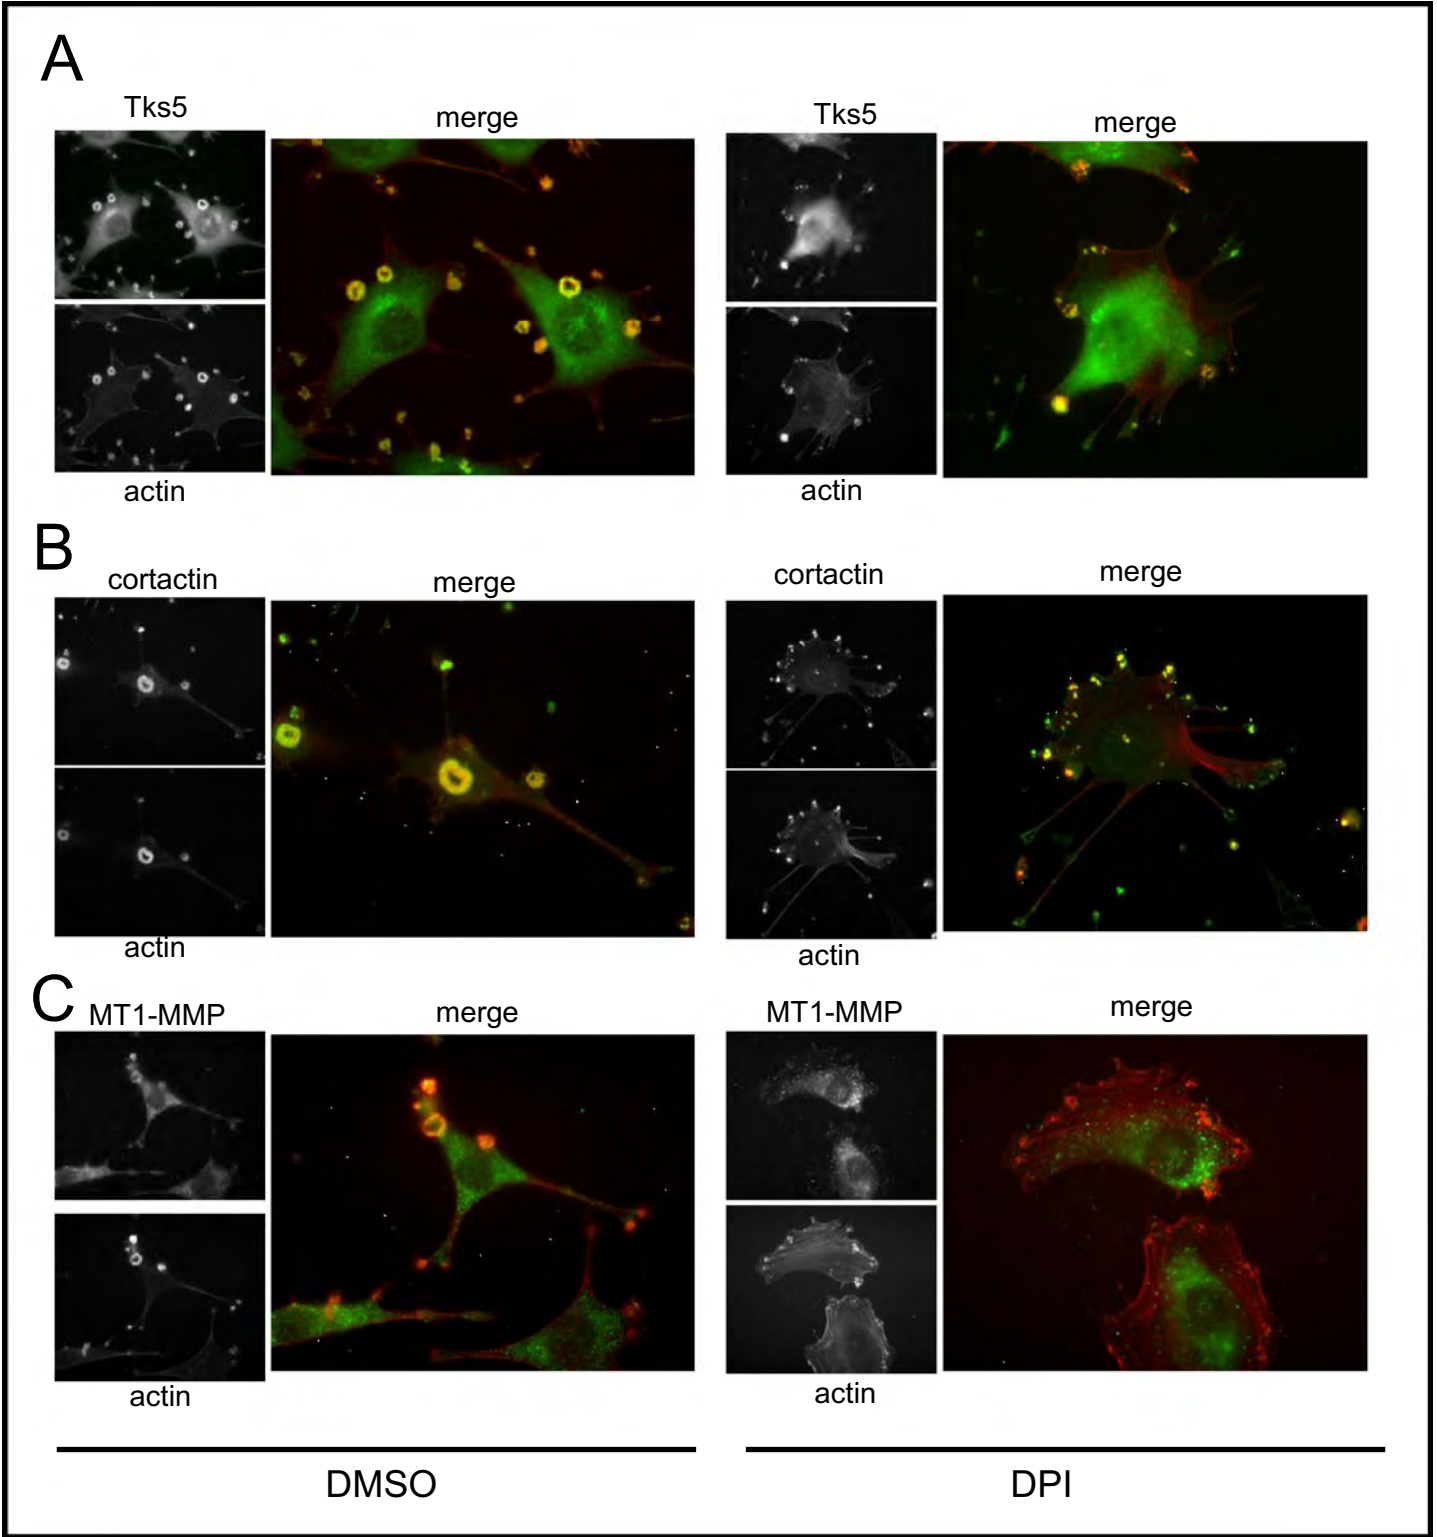

Diaz et al Supplementary Figure 1

**A**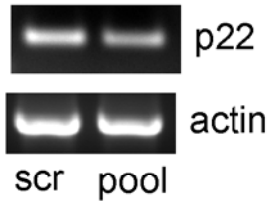**B**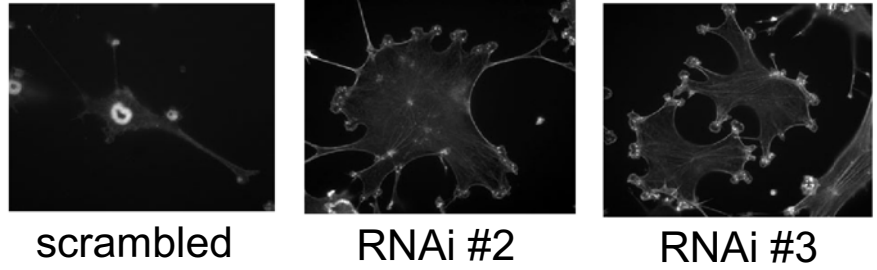**C**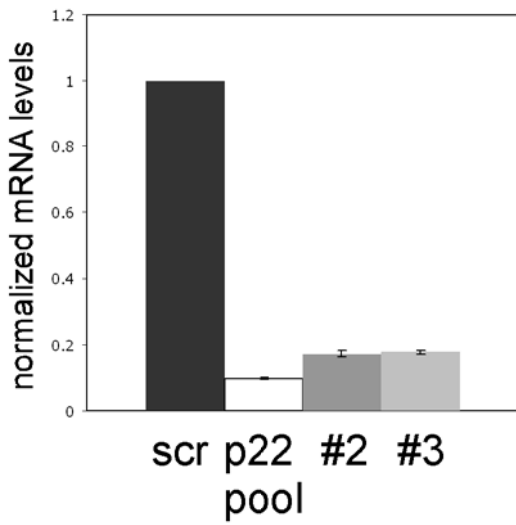**D**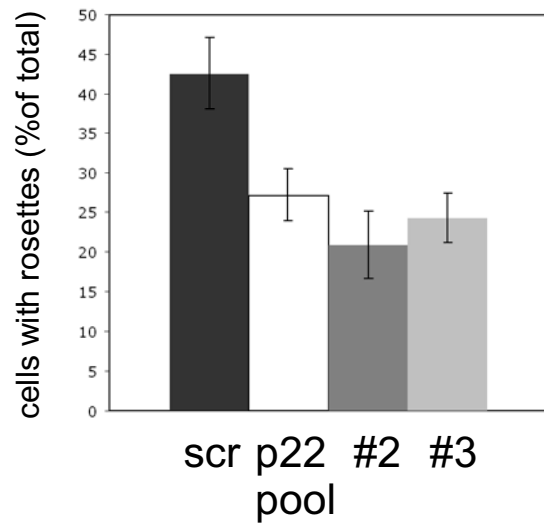

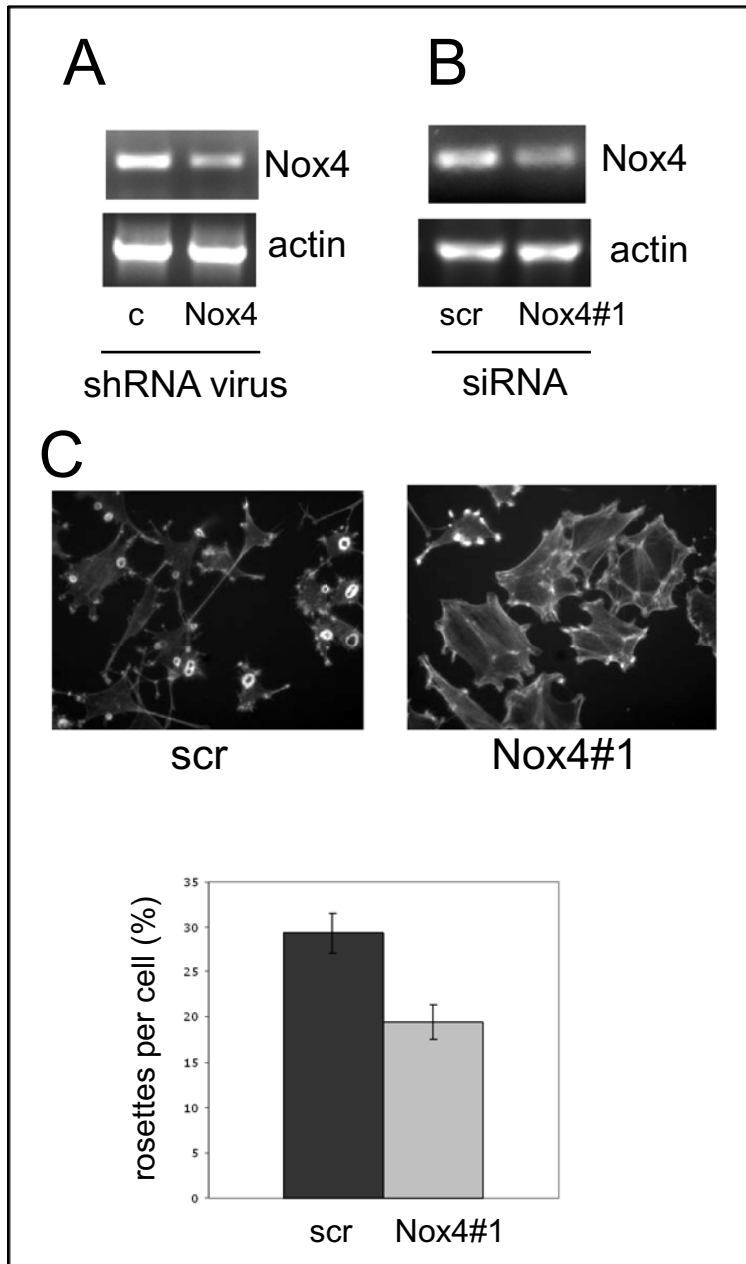

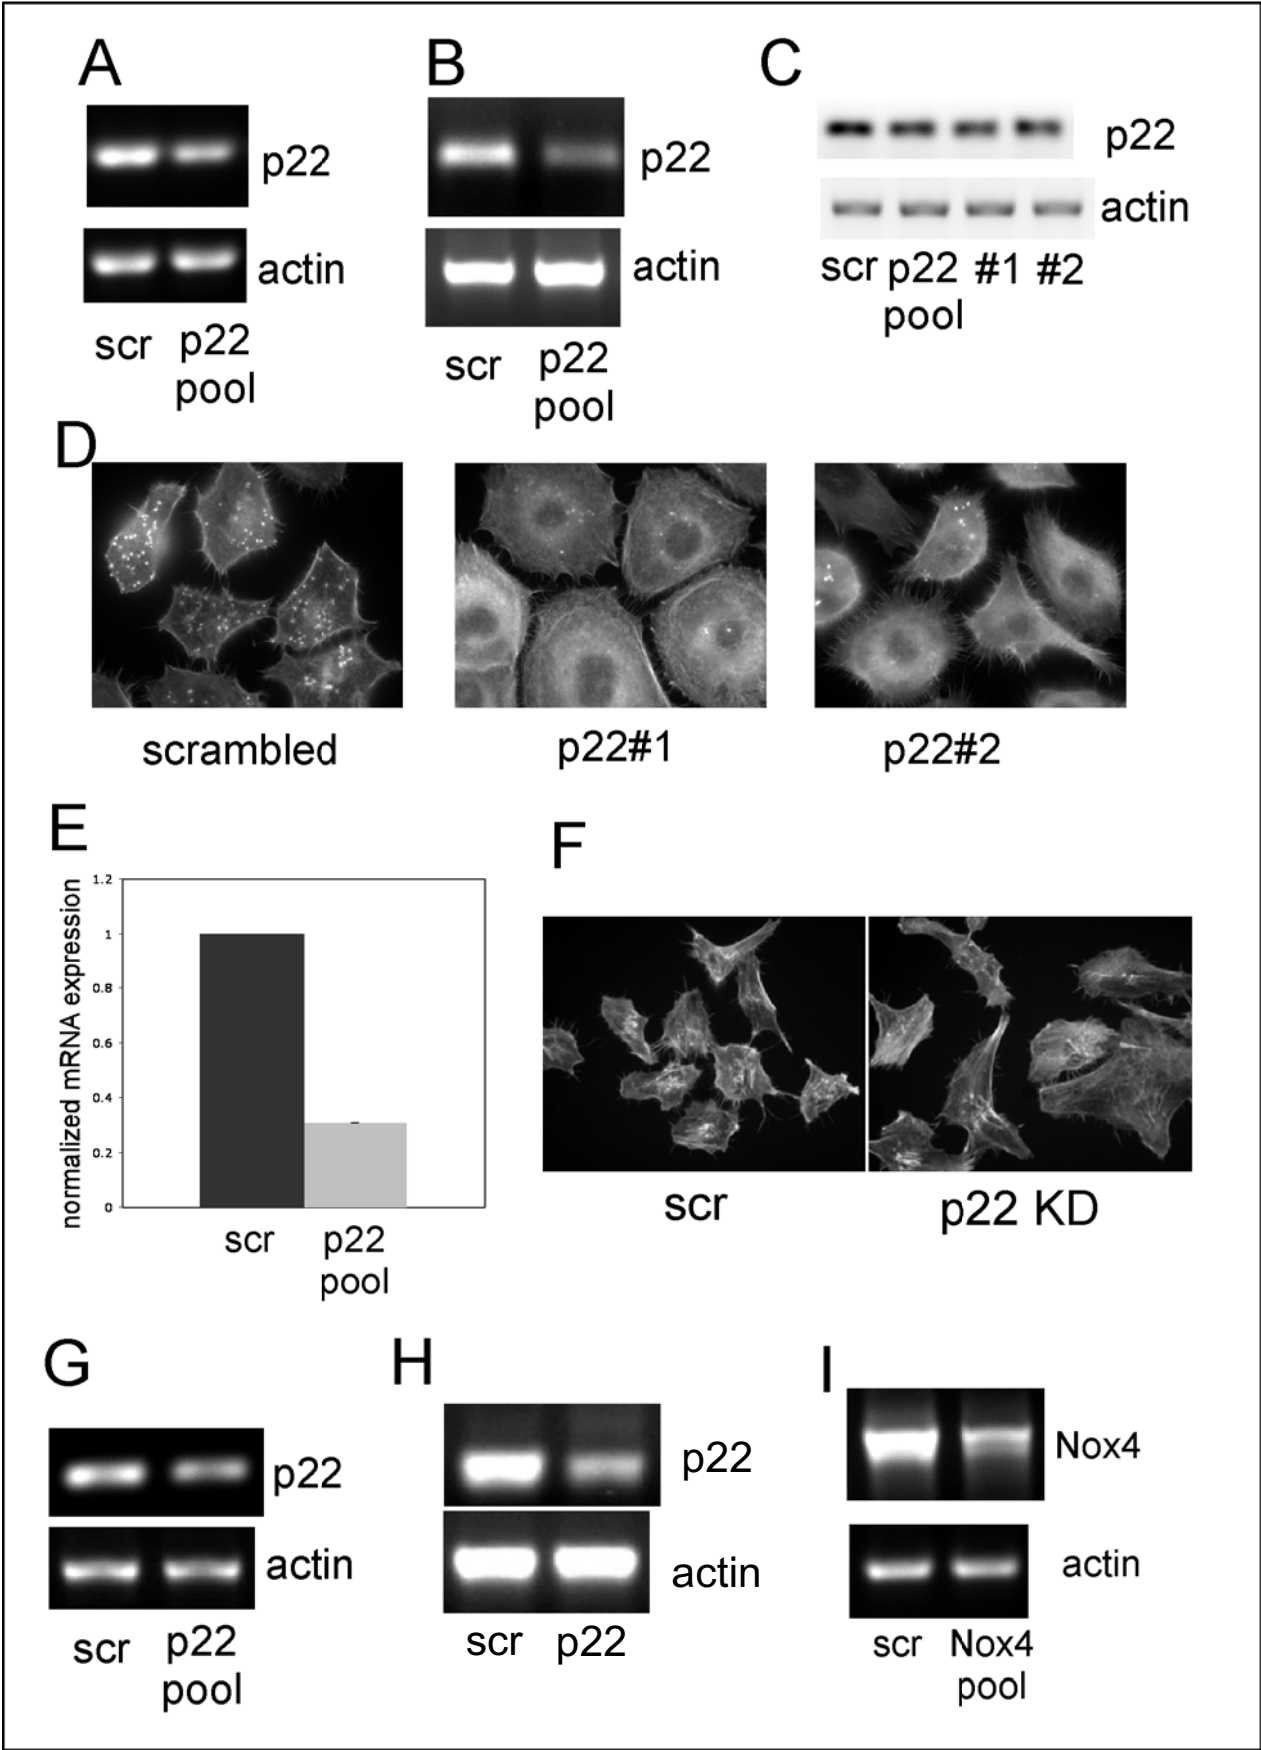

Diaz et al, Supplementary Figure 4

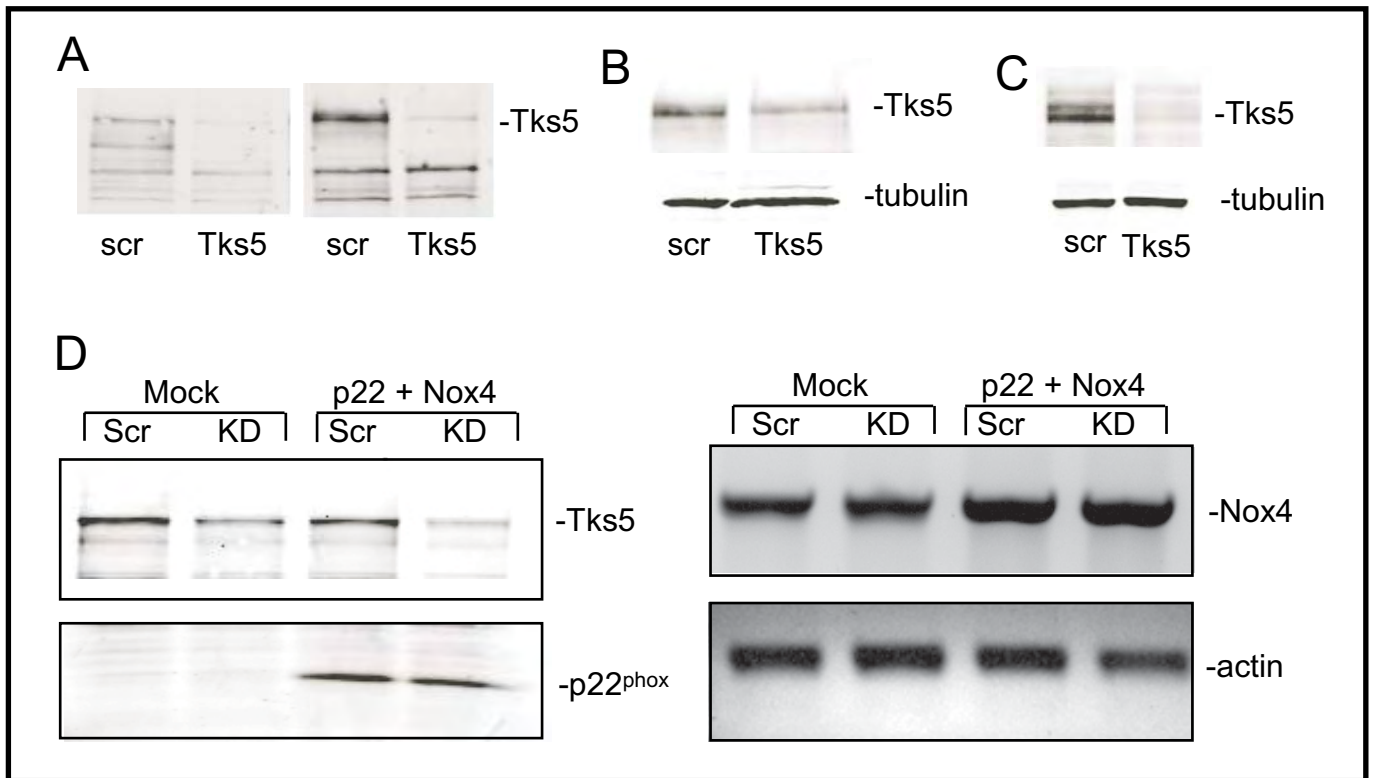

Diaz et al Supplementary Figure 5



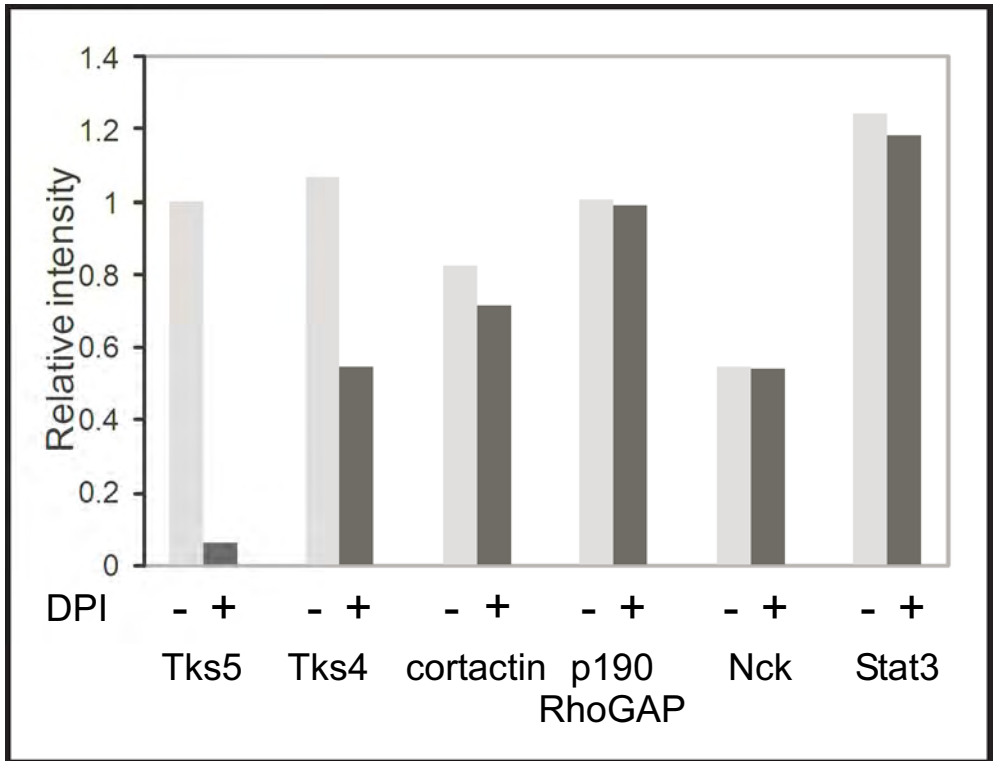

Diaz et al Supplementary Figure 6
